# Supplementary material for: Chitosan–Cu Catalyzed Novel Ferrocenated Spiropyrrolidines: Green Synthesis, Single Crystal X-ray Diffraction, Hirshfeld Surface and Antibacterial Studies
Source: MDPI journal article supplement (doi:10.3390/polym15020429), 2023-01-13
Supplement: s1 [file s1]

# Chitosan–Cu Catalyzed Novel Ferrocenated Spiropyrrolidines: Green Synthesis, Single Crystal X-ray Diffraction, Hirshfeld Surface and Antibacterial Studies

Mohammad Asad <sup>1,2,\*</sup>, Muhammad Nadeem Arshad <sup>1,2</sup>, Abdullah M. Asiri <sup>1,2</sup>, Mohammed M. Rahman <sup>1,2</sup>, Snigdha Kumaran <sup>3</sup> and Mohammed Musthafa Thorakkattil Neerankuzhiyil <sup>3,\*</sup>

<sup>1</sup> Chemistry Department, Faculty of Science, King Abdulaziz University,  
P.O. Box 80203, Jeddah 21589, Saudi Arabia

<sup>2</sup> Center of Excellence for Advanced Materials Research (CEAMR), King Abdulaziz University,  
P.O. Box 80203, Jeddah 21589, Saudi Arabia

<sup>3</sup> Research & Postgraduate Department of Chemistry, MES Kalladi College,  
Mannarkkad 678583, India

\* Correspondence: magkhan@kau.edu.sa (M.A.); drmusthafa@meskc.ac.in (M.M.T.N.)

**Table S1.** Bond Lengths for **3a**.

| Atom | Atom | Length/Å | Atom | Atom | Length/Å |
|------|------|----------|------|------|----------|
| C1   | C2   | 1.530(4) | C19  | C20  | 1.426(4) |
| C1   | C4   | 1.567(4) | C19  | C23  | 1.425(4) |
| C1   | C12  | 1.515(4) | C19  | Fe1  | 2.067(3) |
| C2   | C3   | 1.540(4) | C20  | C21  | 1.412(5) |
| C2   | C19  | 1.509(4) | C20  | Fe1  | 2.046(4) |
| C3   | C29  | 1.526(4) | C21  | C22  | 1.412(5) |
| C3   | N1   | 1.469(4) | C21  | Fe1  | 2.044(4) |
| C4   | C5   | 1.533(4) | C22  | C23  | 1.408(4) |
| C4   | C6   | 1.511(4) | C22  | Fe1  | 2.031(3) |
| C4   | N1   | 1.463(4) | C23  | Fe1  | 2.041(3) |
| C5   | N2   | 1.340(4) | C24  | C25  | 1.421(6) |
| C5   | O2   | 1.228(4) | C24  | C28  | 1.399(6) |
| C6   | C7   | 1.385(4) | C24  | Fe1  | 2.050(4) |
| C6   | C11  | 1.365(5) | C25  | C26  | 1.410(6) |
| C7   | C8   | 1.372(4) | C25  | Fe1  | 2.047(4) |
| C7   | N2   | 1.406(4) | C26  | C27  | 1.377(7) |
| C8   | C9   | 1.370(5) | C26  | Fe1  | 2.035(4) |
| C9   | C10  | 1.374(6) | C27  | C28  | 1.415(6) |
| C10  | C11  | 1.385(5) | C27  | Fe1  | 2.038(4) |
| C12  | C13  | 1.505(4) | C28  | Fe1  | 2.032(4) |
| C12  | O1   | 1.209(3) | C29  | C30  | 1.513(4) |
| C13  | C14  | 1.384(4) | C30  | C31  | 1.394(4) |
| C13  | C18  | 1.390(4) | C30  | C35  | 1.380(4) |
| C14  | C15  | 1.386(4) | C31  | C32  | 1.372(4) |
| C15  | C16  | 1.377(4) | C32  | C33  | 1.374(4) |
| C16  | C17  | 1.362(5) | C33  | C34  | 1.373(4) |
| C16  | Br1  | 1.898(3) | C33  | O3   | 1.382(4) |
| C17  | C18  | 1.376(5) | C34  | C35  | 1.389(5) |

Table S2. Bond Angles for 3a.

| Atom | Atom | Atom | Angle/°   | Atom | Atom | Atom | Angle/°    |
|------|------|------|-----------|------|------|------|------------|
| C4   | C1   | C2   | 104.3(2)  | Fe1  | C26  | C25  | 70.2(2)    |
| C12  | C1   | C2   | 115.7(2)  | Fe1  | C26  | C27  | 70.3(3)    |
| C12  | C1   | C4   | 112.5(2)  | C28  | C27  | C26  | 108.1(4)   |
| C3   | C2   | C1   | 102.1(2)  | Fe1  | C27  | C26  | 70.2(3)    |
| C19  | C2   | C1   | 112.2(2)  | Fe1  | C27  | C28  | 69.4(2)    |
| C19  | C2   | C3   | 115.0(2)  | C27  | C28  | C24  | 108.2(4)   |
| C29  | C3   | C2   | 117.0(3)  | Fe1  | C28  | C24  | 70.7(2)    |
| N1   | C3   | C2   | 105.4(2)  | Fe1  | C28  | C27  | 69.9(2)    |
| N1   | C3   | C29  | 109.6(2)  | C30  | C29  | C3   | 111.6(3)   |
| C5   | C4   | C1   | 108.4(2)  | C31  | C30  | C29  | 119.9(3)   |
| C6   | C4   | C1   | 114.9(2)  | C35  | C30  | C29  | 123.6(3)   |
| C6   | C4   | C5   | 102.1(2)  | C35  | C30  | C31  | 116.5(3)   |
| N1   | C4   | C1   | 104.0(2)  | C32  | C31  | C30  | 122.3(3)   |
| N1   | C4   | C5   | 112.3(2)  | C33  | C32  | C31  | 119.8(3)   |
| N1   | C4   | C6   | 115.2(3)  | C34  | C33  | C32  | 119.8(3)   |
| N2   | C5   | C4   | 108.1(3)  | O3   | C33  | C32  | 117.1(3)   |
| O2   | C5   | C4   | 124.5(3)  | O3   | C33  | C34  | 123.1(3)   |
| O2   | C5   | N2   | 127.4(3)  | C35  | C34  | C33  | 119.8(3)   |
| C7   | C6   | C4   | 108.2(3)  | C34  | C35  | C30  | 121.9(3)   |
| C11  | C6   | C4   | 131.9(3)  | C4   | N1   | C3   | 111.3(2)   |
| C11  | C6   | C7   | 119.8(3)  | C7   | N2   | C5   | 111.9(3)   |
| C8   | C7   | C6   | 122.0(3)  | C20  | Fe1  | C19  | 40.58(11)  |
| N2   | C7   | C6   | 109.4(3)  | C21  | Fe1  | C19  | 68.17(13)  |
| N2   | C7   | C8   | 128.6(3)  | C21  | Fe1  | C20  | 40.39(13)  |
| C9   | C8   | C7   | 117.5(3)  | C22  | Fe1  | C19  | 68.60(13)  |
| C10  | C9   | C8   | 121.4(4)  | C22  | Fe1  | C20  | 68.31(15)  |
| C11  | C10  | C9   | 120.5(4)  | C22  | Fe1  | C21  | 40.54(14)  |
| C10  | C11  | C6   | 118.7(3)  | C23  | Fe1  | C19  | 40.59(12)  |
| C13  | C12  | C1   | 119.5(3)  | C23  | Fe1  | C20  | 67.88(14)  |
| O1   | C12  | C1   | 120.4(3)  | C23  | Fe1  | C21  | 67.71(14)  |
| O1   | C12  | C13  | 120.2(2)  | C23  | Fe1  | C22  | 40.46(12)  |
| C14  | C13  | C12  | 123.4(3)  | C24  | Fe1  | C19  | 110.99(14) |
| C18  | C13  | C12  | 118.3(3)  | C24  | Fe1  | C20  | 127.38(16) |
| C18  | C13  | C14  | 118.3(3)  | C24  | Fe1  | C21  | 162.25(19) |
| C15  | C14  | C13  | 121.4(3)  | C24  | Fe1  | C22  | 156.99(19) |
| C16  | C15  | C14  | 118.3(3)  | C24  | Fe1  | C23  | 124.05(16) |
| C17  | C16  | C15  | 121.6(3)  | C25  | Fe1  | C19  | 124.37(16) |
| Br1  | C16  | C15  | 118.4(3)  | C25  | Fe1  | C20  | 109.49(17) |
| Br1  | C16  | C17  | 120.0(2)  | C25  | Fe1  | C21  | 124.12(18) |
| C18  | C17  | C16  | 119.7(3)  | C25  | Fe1  | C22  | 158.87(17) |
| C17  | C18  | C13  | 120.8(3)  | C25  | Fe1  | C23  | 159.94(17) |
| C20  | C19  | C2   | 127.0(3)  | C25  | Fe1  | C24  | 40.57(17)  |
| C23  | C19  | C2   | 126.6(3)  | C26  | Fe1  | C19  | 158.4(2)   |
| C23  | C19  | C20  | 106.3(3)  | C26  | Fe1  | C20  | 121.63(19) |
| Fe1  | C19  | C2   | 129.6(2)  | C26  | Fe1  | C21  | 106.05(18) |
| Fe1  | C19  | C20  | 68.93(18) | C26  | Fe1  | C22  | 121.44(18) |
| Fe1  | C19  | C23  | 68.72(18) | C26  | Fe1  | C23  | 158.44(19) |
| C21  | C20  | C19  | 108.5(3)  | C26  | Fe1  | C24  | 67.83(19)  |
| Fe1  | C20  | C19  | 70.49(19) | C26  | Fe1  | C25  | 40.40(17)  |
| Fe1  | C20  | C21  | 69.7(2)   | C27  | Fe1  | C19  | 161.8(2)   |

|     |     |     |           |     |     |     |            |
|-----|-----|-----|-----------|-----|-----|-----|------------|
| C22 | C21 | C20 | 108.3(3)  | C27 | Fe1 | C20 | 154.69(19) |
| Fe1 | C21 | C20 | 69.89(19) | C27 | Fe1 | C21 | 118.84(18) |
| Fe1 | C21 | C22 | 69.3(2)   | C27 | Fe1 | C22 | 105.07(18) |
| C23 | C22 | C21 | 107.6(3)  | C27 | Fe1 | C23 | 123.8(2)   |
| Fe1 | C22 | C21 | 70.2(2)   | C27 | Fe1 | C24 | 67.81(18)  |
| Fe1 | C22 | C23 | 70.12(18) | C27 | Fe1 | C25 | 67.4(2)    |
| C22 | C23 | C19 | 109.2(3)  | C27 | Fe1 | C26 | 39.51(19)  |
| Fe1 | C23 | C19 | 70.69(17) | C28 | Fe1 | C19 | 126.55(17) |
| Fe1 | C23 | C22 | 69.42(19) | C28 | Fe1 | C20 | 163.66(18) |
| C28 | C24 | C25 | 107.4(4)  | C28 | Fe1 | C21 | 154.8(2)   |
| Fe1 | C24 | C25 | 69.6(2)   | C28 | Fe1 | C22 | 120.37(19) |
| Fe1 | C24 | C28 | 69.2(2)   | C28 | Fe1 | C23 | 108.83(17) |
| C26 | C25 | C24 | 107.3(5)  | C28 | Fe1 | C24 | 40.09(18)  |
| Fe1 | C25 | C24 | 69.8(2)   | C28 | Fe1 | C25 | 67.7(2)    |
| Fe1 | C25 | C26 | 69.4(2)   | C28 | Fe1 | C26 | 67.5(2)    |
| C27 | C26 | C25 | 108.9(4)  | C28 | Fe1 | C27 | 40.71(18)  |

**Table S3.** Torsion Angles for **3a**.

| A  | B   | C   | D   | Angle/°   | A   | B   | C   | D   | Angle/°   |
|----|-----|-----|-----|-----------|-----|-----|-----|-----|-----------|
| C1 | C2  | C3  | C29 | -154.0(2) | C7  | C8  | C9  | C10 | -2.2(4)   |
| C1 | C2  | C3  | N1  | -32.0(2)  | C8  | C9  | C10 | C11 | 1.9(5)    |
| C1 | C2  | C19 | C20 | -153.6(2) | C12 | C13 | C14 | C15 | -177.5(3) |
| C1 | C2  | C19 | C23 | 30.2(3)   | C12 | C13 | C18 | C17 | 178.0(3)  |
| C1 | C2  | C19 | Fe1 | -61.4(2)  | C13 | C14 | C15 | C16 | -0.8(3)   |
| C1 | C4  | C5  | N2  | -116.0(2) | C13 | C18 | C17 | C16 | 0.0(4)    |
| C1 | C4  | C5  | O2  | 61.3(3)   | C14 | C15 | C16 | C17 | -0.0(4)   |
| C1 | C4  | C6  | C7  | 111.4(3)  | C14 | C15 | C16 | Br1 | -179.3(2) |
| C1 | C4  | C6  | C11 | -66.4(3)  | C15 | C16 | C17 | C18 | 0.4(4)    |
| C1 | C4  | N1  | C3  | 6.2(3)    | C19 | C20 | C21 | C22 | -1.3(3)   |
| C1 | C12 | C13 | C14 | -9.2(3)   | C19 | C20 | C21 | Fe1 | -60.0(3)  |
| C1 | C12 | C13 | C18 | 172.0(3)  | C19 | C23 | C22 | C21 | -0.8(3)   |
| C2 | C3  | C29 | C30 | -158.8(3) | C19 | C23 | C22 | Fe1 | 59.7(3)   |
| C2 | C3  | N1  | C4  | 16.3(3)   | C20 | C21 | C22 | C23 | 1.3(3)    |
| C2 | C19 | C20 | C21 | -176.0(3) | C20 | C21 | C22 | Fe1 | -59.1(3)  |
| C2 | C19 | C20 | Fe1 | 124.4(3)  | C21 | C22 | C23 | Fe1 | -60.5(3)  |
| C2 | C19 | C23 | C22 | 176.9(3)  | C24 | C25 | C26 | C27 | -0.1(4)   |
| C2 | C19 | C23 | Fe1 | -124.3(3) | C24 | C25 | C26 | Fe1 | 59.8(3)   |
| C3 | C29 | C30 | C31 | 73.0(3)   | C24 | C28 | C27 | C26 | -0.8(4)   |
| C3 | C29 | C30 | C35 | -104.7(3) | C24 | C28 | C27 | Fe1 | -60.5(4)  |
| C3 | N1  | C4  | C5  | 123.3(3)  | C25 | C26 | C27 | C28 | 0.6(4)    |
| C3 | N1  | C4  | C6  | -120.4(3) | C25 | C26 | C27 | Fe1 | 59.9(3)   |
| C4 | C5  | N2  | C7  | -3.7(3)   | C26 | C27 | C28 | Fe1 | 59.8(4)   |
| C4 | C6  | C7  | C8  | -176.0(2) | C29 | C30 | C31 | C32 | -178.3(3) |
| C4 | C6  | C7  | N2  | 4.0(2)    | C29 | C30 | C35 | C34 | 178.2(3)  |
| C4 | C6  | C11 | C10 | 175.2(4)  | C30 | C31 | C32 | C33 | 0.1(4)    |
| C5 | N2  | C7  | C6  | -0.1(3)   | C30 | C35 | C34 | C33 | -0.0(4)   |
| C5 | N2  | C7  | C8  | 179.8(3)  | C31 | C32 | C33 | C34 | 0.4(4)    |
| C6 | C7  | C8  | C9  | 0.2(4)    | C31 | C32 | C33 | O3  | -179.2(3) |
| C6 | C11 | C10 | C9  | 0.5(4)    | C32 | C33 | C34 | C35 | -0.4(4)   |

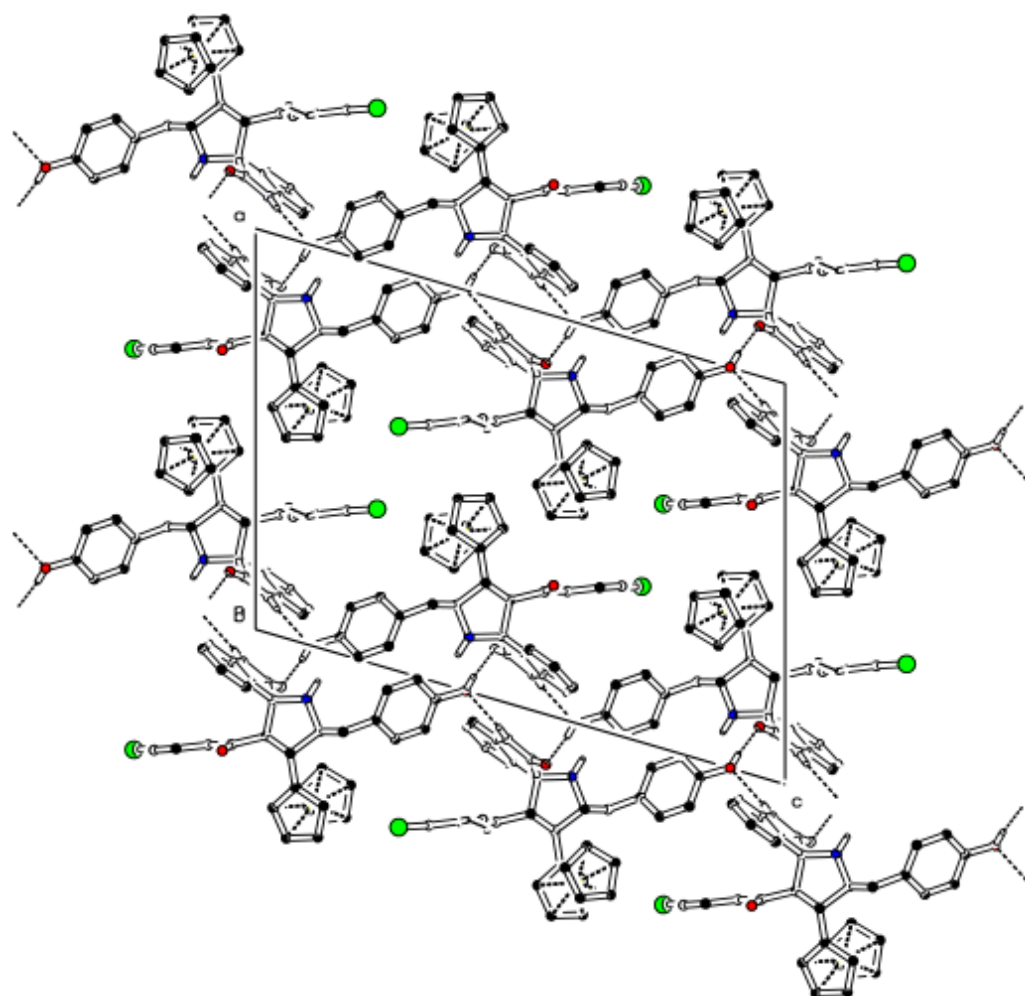

**Figure S1.** Showing the hydrogen bonding interaction and ring motif  $R_4^4(12)$  formation, hydrogen atoms not involved in hydrogen bonding have been omitted for clarity.
